# Supplementary material for: Statistical Analysis of the Performance of Local Veterinary Laboratories in Molecular Detection (rRT-PCR) of Avian Influenza Virus via National Proficiency Testing Performed during 2020–2022
Source: MDPI journal article supplement (doi:10.3390/v15040823), 2023-03-24
Supplement: s1 [file s1]

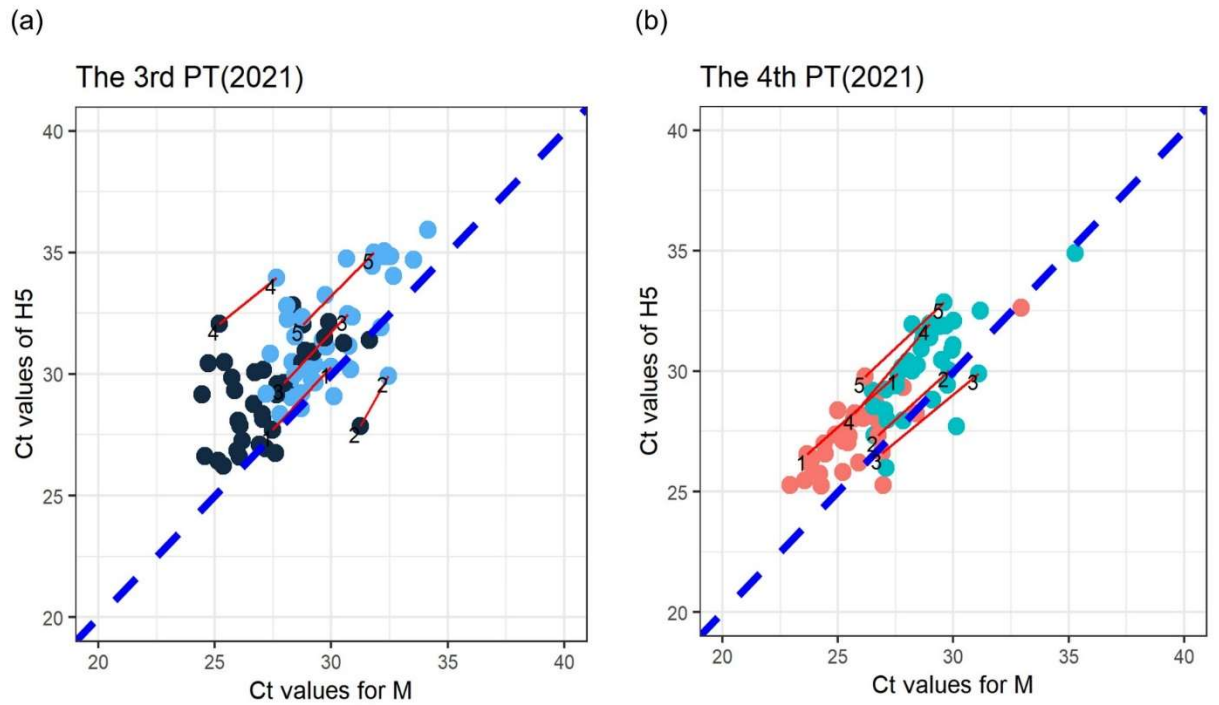

**Figure S1.** Scatter plot of the Ct values for CDSs from all participants. The Ct values of CDSs, a pair of CDSs with different concentrations but with the same strain, for the M and H5 genes were represented as the X- (M) and Y-axis (H5) values of dots with different colors. The scatter plots for the (a) 3rd and (b) 4th PT round were given to the 5 participants in the same province as feedback in the post analysis report. The results of 5 labs in same province were converged in 4th PT round after the feedback on the 3rd PT round.
